# Supplementary material for: The TALE Class Homeobox Gene Smed-prep Defines the Anterior Compartment for Head Regeneration
Source: PLoS Genet. 2010 Apr 22;6(4):e1000915. doi: 10.1371/journal.pgen.1000915 (PMC2858555; doi:10.1371/journal.pgen.1000915)
Supplement: Figure S1 — Alignment of Smed-prep translation to other animal PREP proteins. Alignment of Smed-Prep across the conserved MEIS and Homeodomain regions of this TALE class protein with other animals. The Smed-Prep translation is underlined in red. (0.03 MB PDF) [file pgen.1000915.s001.pdf]

**Figure S1, related to Figure 1**

**A**

**Sequence alignment of the MEIS domain**

|                  |   |                                                               |
|------------------|---|---------------------------------------------------------------|
| Prep2 H.sapiens  | 1 | QAQLEADKRAVYRHPLFPLLTLLEFEKCEQATQGSFCITSASFVDVDIENFVHQEQEHKPF |
| Prep2 M.musculus | 1 | QAQLEADKRAVYRHPLFPLLTLLEFEKCEQATQGSFCITSASFVDVDIENFVHQEQEHKPF |
| Prep1 H.sapiens  | 1 | QTPMDVDKQAIYRHPLFPLLALLFEKCEQSTQGSFGTTSASFVDVDIENFVRKQEKDGKPF |
| Prep1 M.musculus | 1 | QTPMDADKQAIYRHPLFPLLALLFEKCEQSTQGSFGTTSASFVDVDIENFVRKQEKDGKPF |
| X.tropicalis     | 1 | QAQLEADKRAVYRHPLFPLLTLLEFEKCEQATQGSFCITSASFVDVDIENFVHQEQEHKPF |
| Prep1.1 D.rerio  | 1 | QTPMDIDKACTYRHPLFPLLALLFEKCEQSTLGSDCVTSASFVDVDIENFVRSQEKDGKAF |
| Smed-prep        | 1 | ADGLEKEKKSTYCHPLYPILSLLEQCEQATASPDSSQSPDTFEADLQSYILRNDNNEKYF  |
| C.intestinalis   | 1 | AAQLENDKHLTKTHPLFVLLLELFEKCEATRCEDNPTSLSFDDDIQEFVRREDFRMSPI   |
| T.castaneum      | 1 | QAQFEADKRAVYKHPLFPLLALLFERCELATQSSDPQSSDAFNLDIQAQVQHQRDRKPF   |
| A.mellifera      | 1 | QAQFEADKRAVYKHPLFPLLALLFERCEQATQSSDNSTSESNMDIQAQVQHQRDRKPF    |
| H.magnipapillata | 1 | ---MENEKVAIYRHPLFPLLALLLEKCEHATQTSDCPTSDAFDNDIKNFMQMHNREGKPC  |
| N.vectensis      | 1 | ---MENEKVAIYRHPLFPLLALLLEKCEHATQTSDCPTSDAFDNDIKNFMQMHNREGKPC  |

|                  |    |                                                        |
|------------------|----|--------------------------------------------------------|
| Prep2 H.sapiens  | 61 | FSDDPELDNLNVKAIQVLRHLLLEKVNELCKDFCNRYITCLKTKMHSNLLRN   |
| Prep2 M.musculus | 61 | FSDDPELDNLNVKAIQVLRHLLLEKVNELCKDFCNRYITCLKTKMHSNLLRN   |
| Prep1 H.sapiens  | 61 | FCEDPETDNLNVKAIQVLRHLLLEKVNELCKDFCSRYIACLKTKMNSETLLSG  |
| Prep1 M.musculus | 61 | FCEDPETDNLNVKAIQVLRHLLLEKVNELCKDFCSRYIACLKTKMNSETLLSG  |
| X.tropicalis     | 61 | FSDDPELDNLNVKAIQVLRHLLLEKVNELCKDFCNRYITCLKTKMHSNLLRN   |
| Prep1.1 D.rerio  | 61 | FSDDPDLNLMVKAIQVLRHLLLEKVSLLCKDFCSRYISCLKAKMNSETLLSG   |
| Smed-prep        | 61 | FTDNKDLDLSLMVKAIQVLRHLLLEKVNELCKDFCSRYINCLKTKIQSDSMFDD |
| C.intestinalis   | 61 | IIDNPEIDNLMKAIQVLRHLLLEKVNELCKDFCHRYITCLKTKMHSNLLRT    |
| T.castaneum      | 61 | LANEPEIDGLMVKAIQVLRHLLLEKVNELCKDFCNRYITCLKTKMSENLLRS   |
| A.mellifera      | 61 | LINDPEIDGLMVKAIQVLRHLLLEKVNELCKDFCNRYITCLKTKMSENLLRS   |
| H.magnipapillata | 58 | FSGDQELDNLITKAIQVLRHLLLEKVNELCKDFCORYIACLKTKMSENLLR-   |
| N.vectensis      | 58 | FSGDQELDNLITKAIQVLRHLLLEKVNELCKDFCORYIACLKTKMSENLLR-   |

**B**

**Sequence alignment of the Homeodomain**

|                  |   |                                                                 |
|------------------|---|-----------------------------------------------------------------|
| Prep2 H.sapiens  | 1 | KSKNKRGLPKHATNIMRSWLFQHLMHPYPTDEKQIAAQTNLTLLQVNNWFINARRRILQPM   |
| Prep2 M.musculus | 1 | KSKNKRGLPKHATNIMRSWLFQHLMHPYPTDEKQIAAQTNLTLLQVNNWFINARRRILQPM   |
| Prep1 H.sapiens  | 1 | SSKNKRGLPKHATNVMRSWLFQHGHHPYPTDEKKQIAAQTNLTLLQVNNWFINARRRILQPM  |
| Prep1 M.musculus | 1 | SSKNKRGLPKHATNVMRSWLFQHGHHPYPTDEKKQIAAQTNLTLLQVNNWFINARRRILQPM  |
| Prep1.1 D.rerio  | 1 | SPKNKRGLPKQATNVMRSWLFQHLAHPYPTDEKKQIAATQTNLTLLQVNNWFINARRRILQPM |
| X.tropicalis     | 1 | KSKNKRGLPKHATNIMRSWLFQHLMHPYPTDEKQIAAQTNLTLLQVNNWFINARRRILQPM   |
| Smed-prep        | 1 | PTKQKRGLPKKATQIMKQWLFQHLVHPYPTDEKQIATQTNLTLLQVNNWFINARRRILQPM   |
| C.intestinalis   | 1 | GRKTKRGLPKQATEILLRSWLFSHIVHPYPTDEKRSLATQTNLTLLQVNNWFINARRRILQPM |
| T.castaneum      | 1 | -RKQKRGLPKHATSVMRSWLFQHLVHPYPTDEKRHIAAQTNLTLLQVNNWFINARRRILQPM  |
| A.mellifera      | 1 | KGRQKRGLPKQATSIMRTWLFQHLVHPYPTDEKQIASQTNLTLLQVNNWFINARRRILQPM   |
| H.magnipapillata | 1 | TVKSKRGLPKQATSIMKTWLFQHIMHPYPTDEKRSLAQQTNLTLQVNNWFINARRRILQPM   |
| N.vectensis      | 1 | TVKSKRGLPKQATSIMKTWLFQHIMHPYPTDEKRSLAQQTNLTLQVNNWFINARRRILQPM   |
