# Supplementary material for: The TALE Class Homeobox Gene Smed-prep Defines the Anterior Compartment for Head Regeneration
Source: PubMed Central journal article supplement (PMC2858555; doi:10.1371/journal.pgen.1000915), 2010-04-22

Figure S2, related to Figure 2

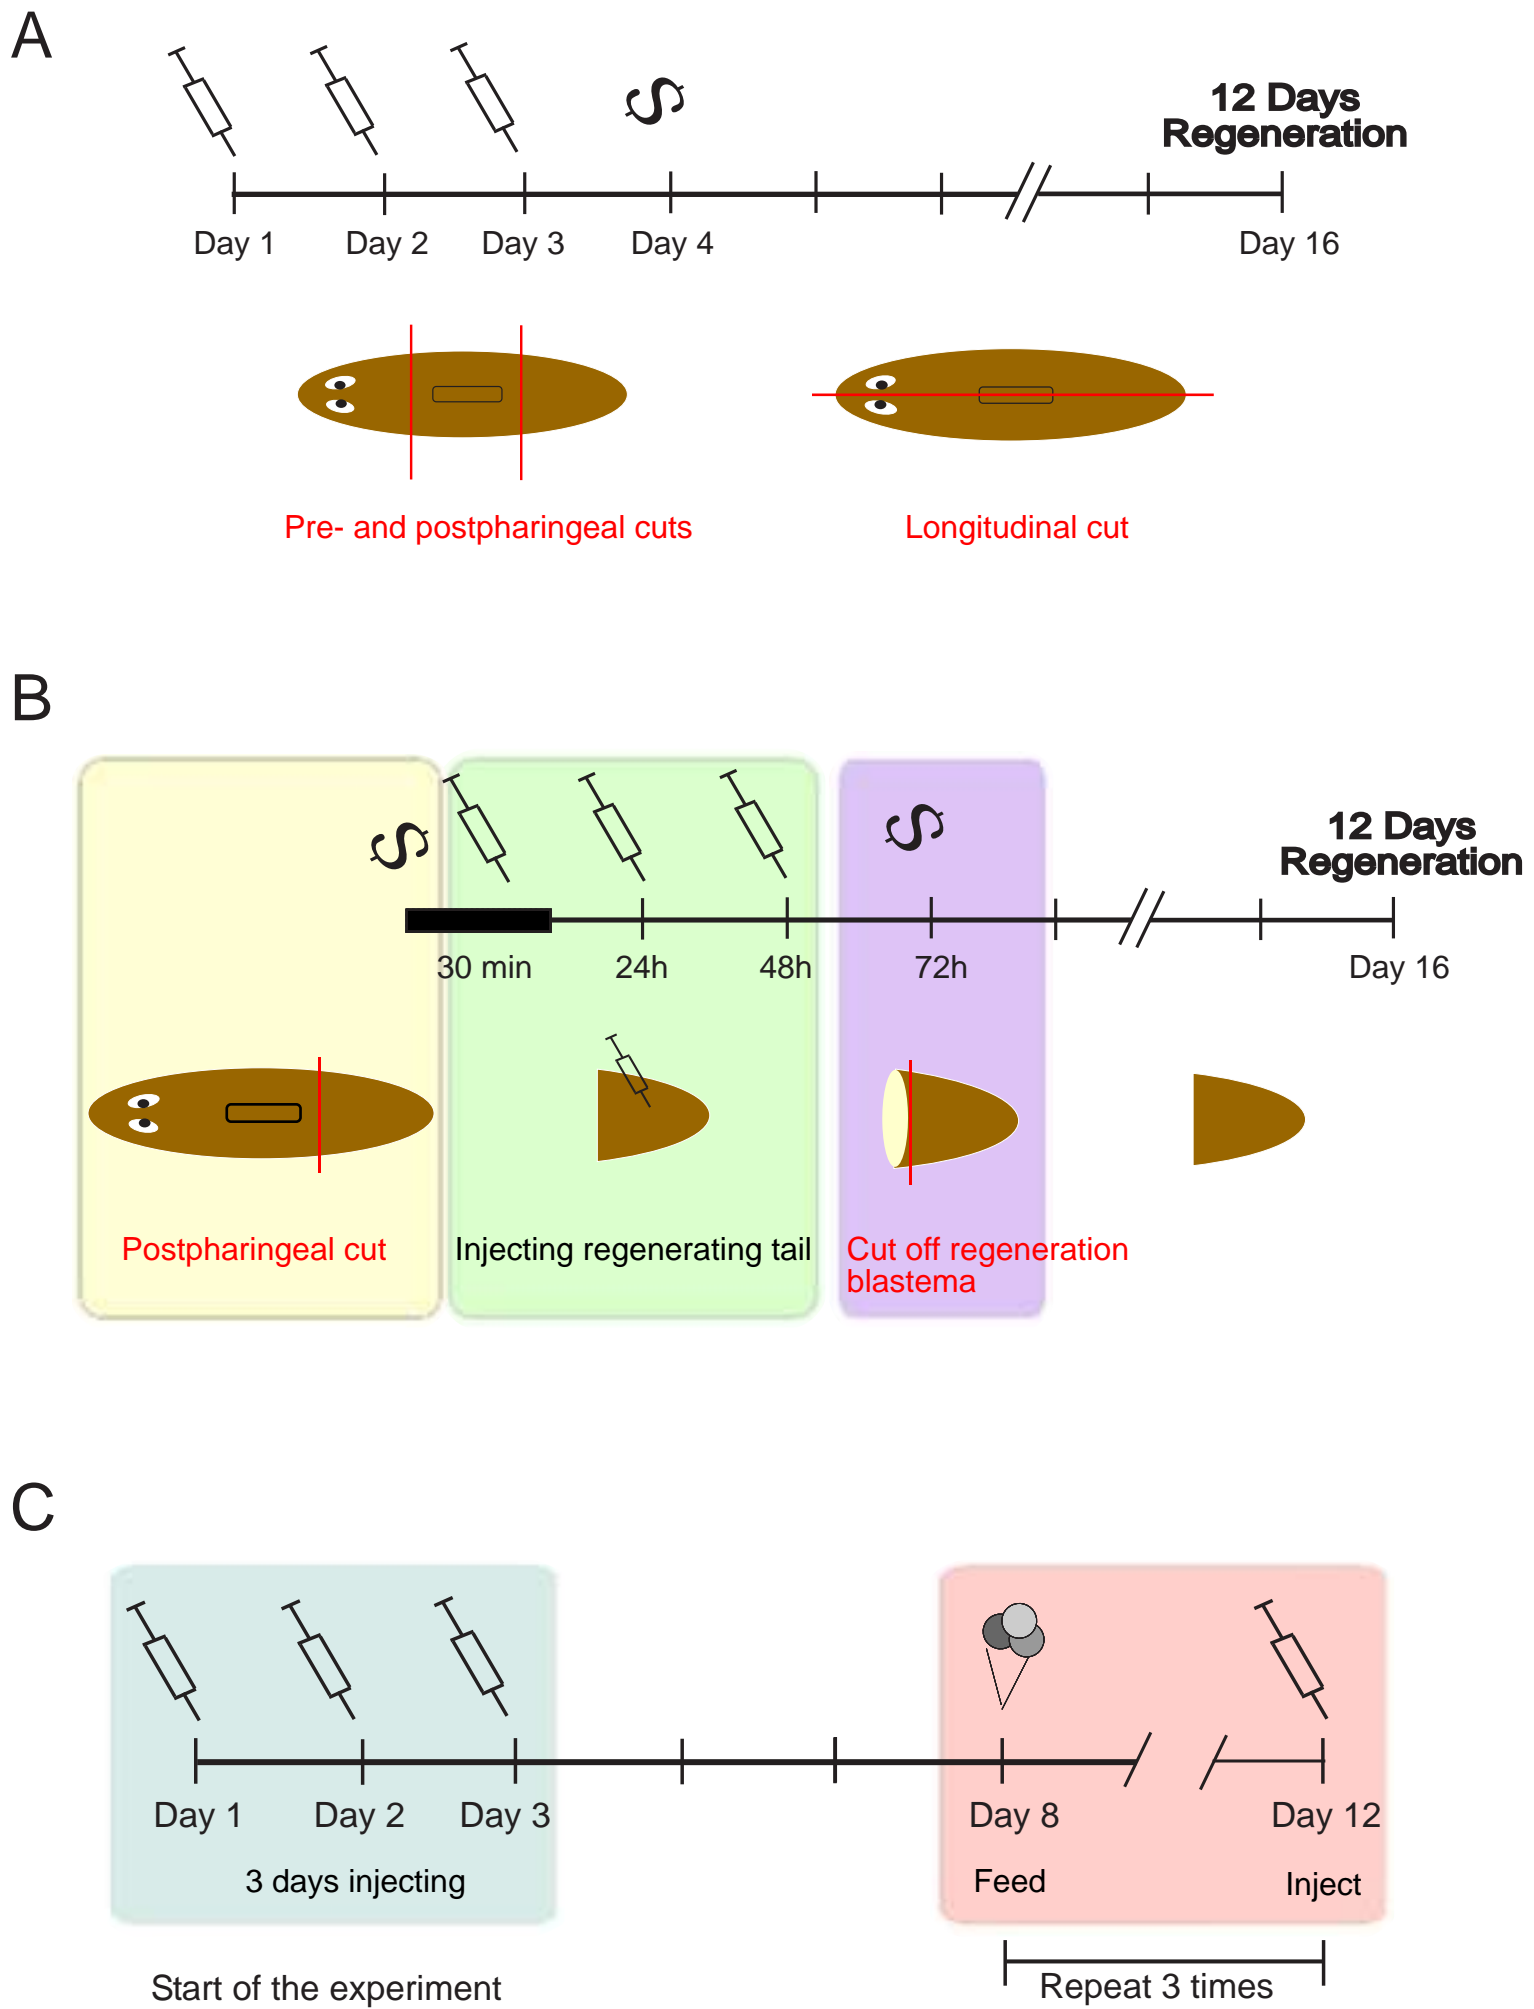

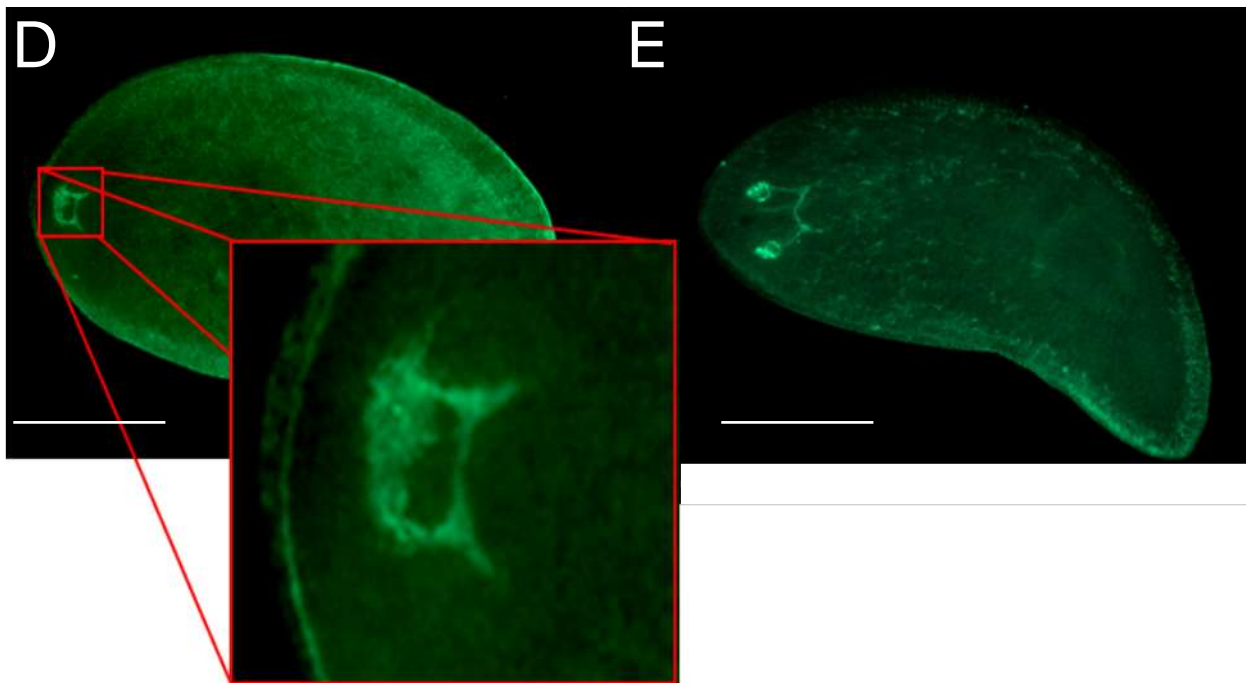

*gfp(RNAi)*

*Smed-prep(RNAi)*

*Smed-slit*

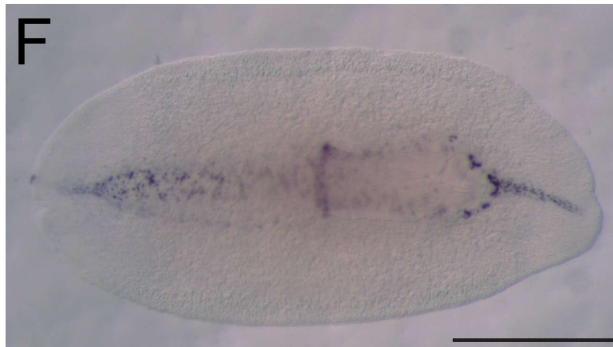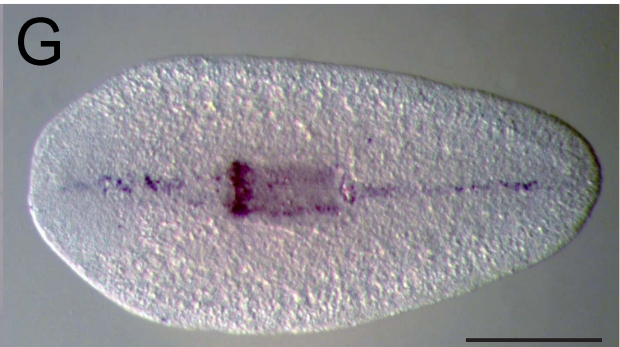

*Smed-sFRP-1*

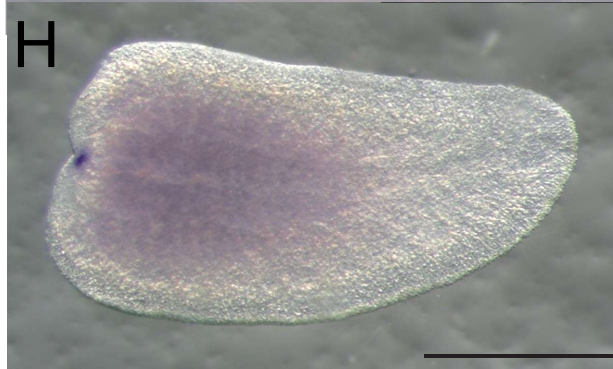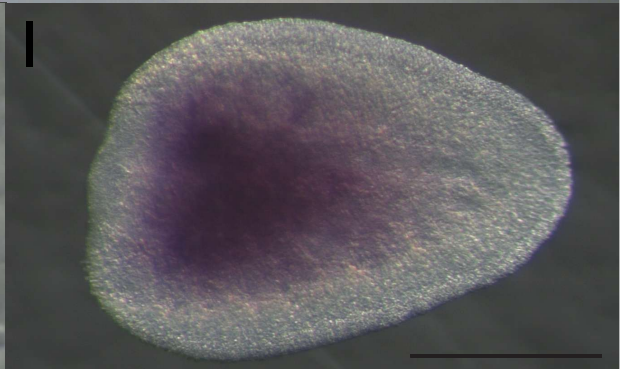

*Smed-HoxD*

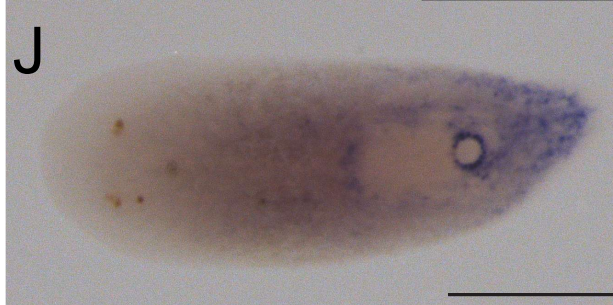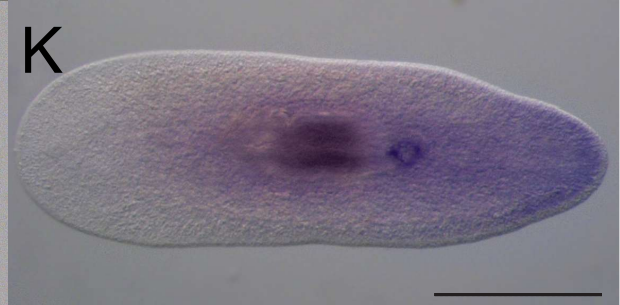

*Smed-Tcen49*

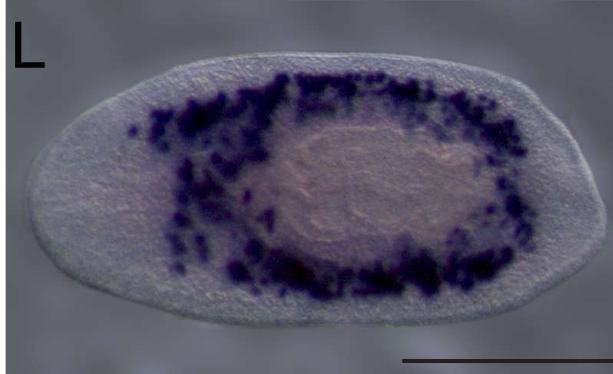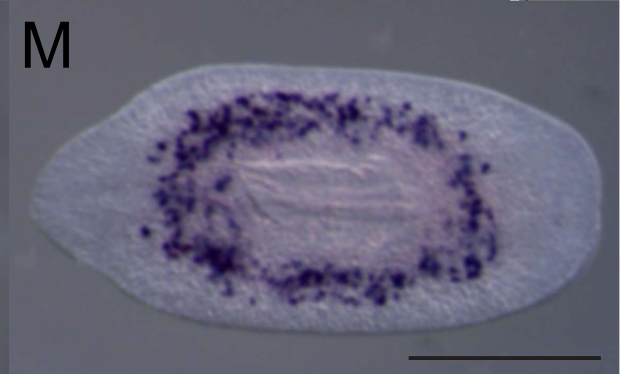

Supplement: pgen.1000915.s002.pdf [file pgen.1000915.s002.pdf]
